# Supplementary material
Source: JCI journal article supplement (doi:10.1172/jci198342)
Supplement: sd1 [file 1]

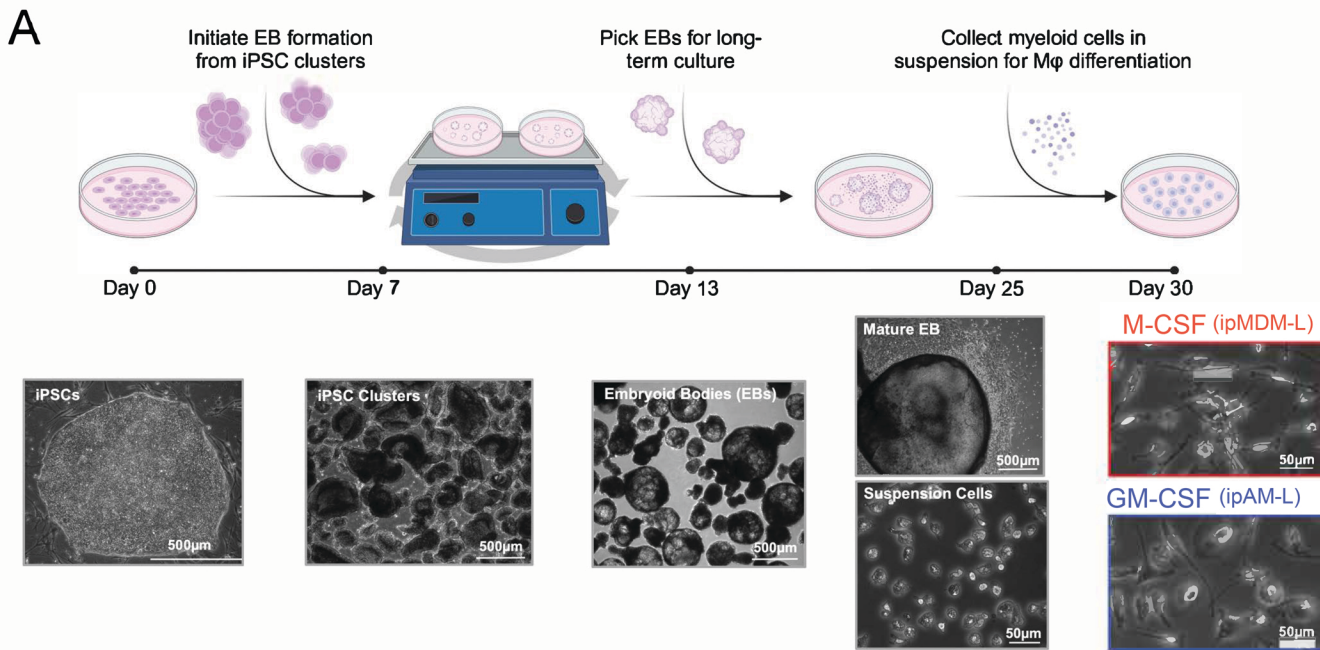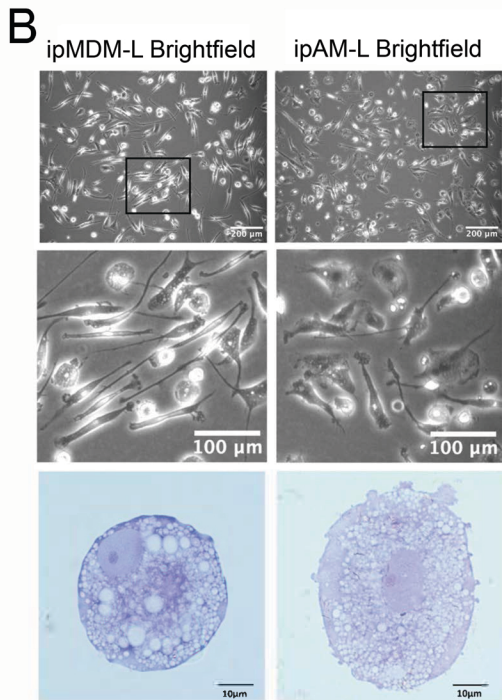

Figure S1

**A**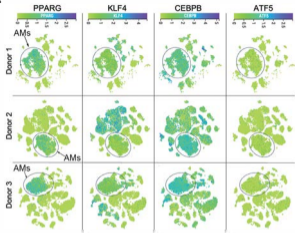**B**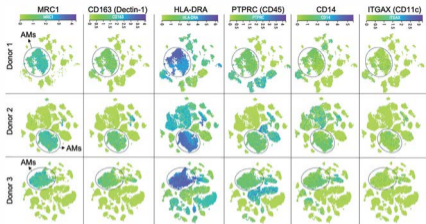**C**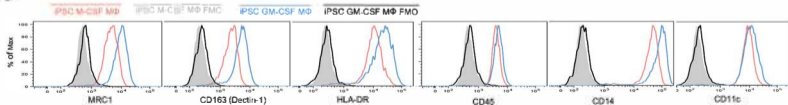

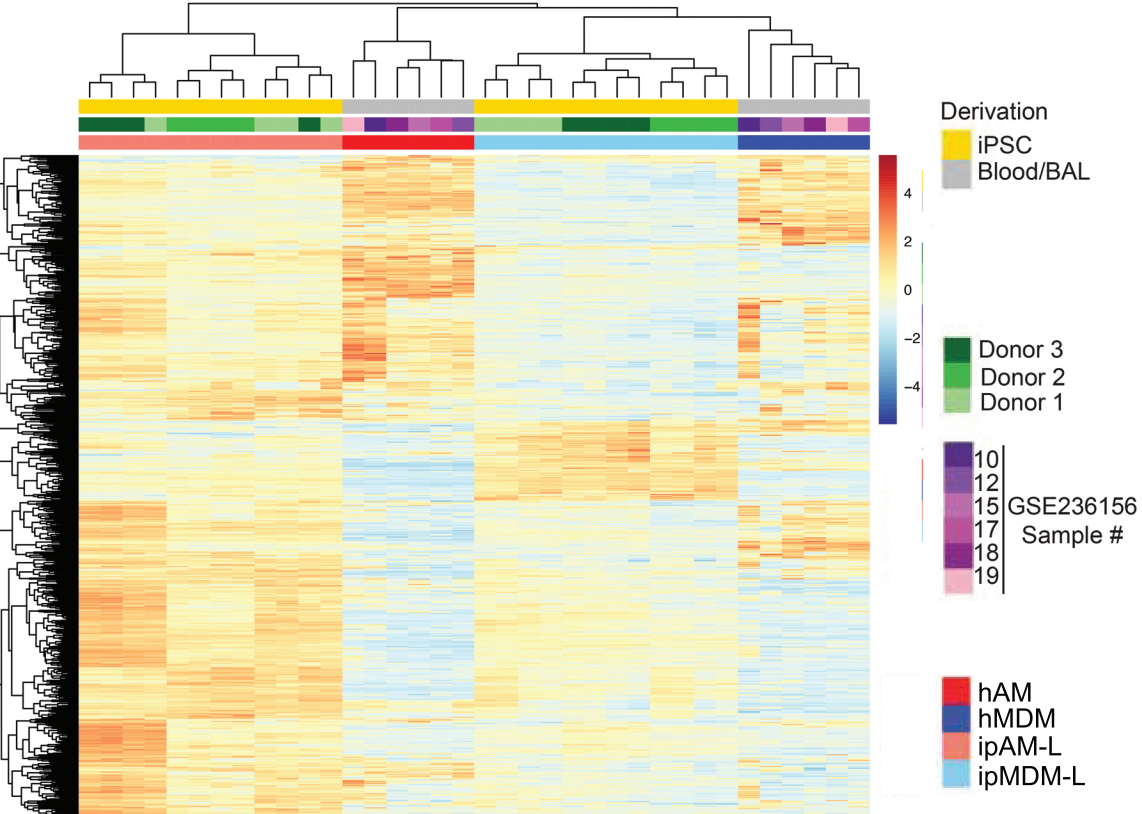

Figure S3

Figure S4

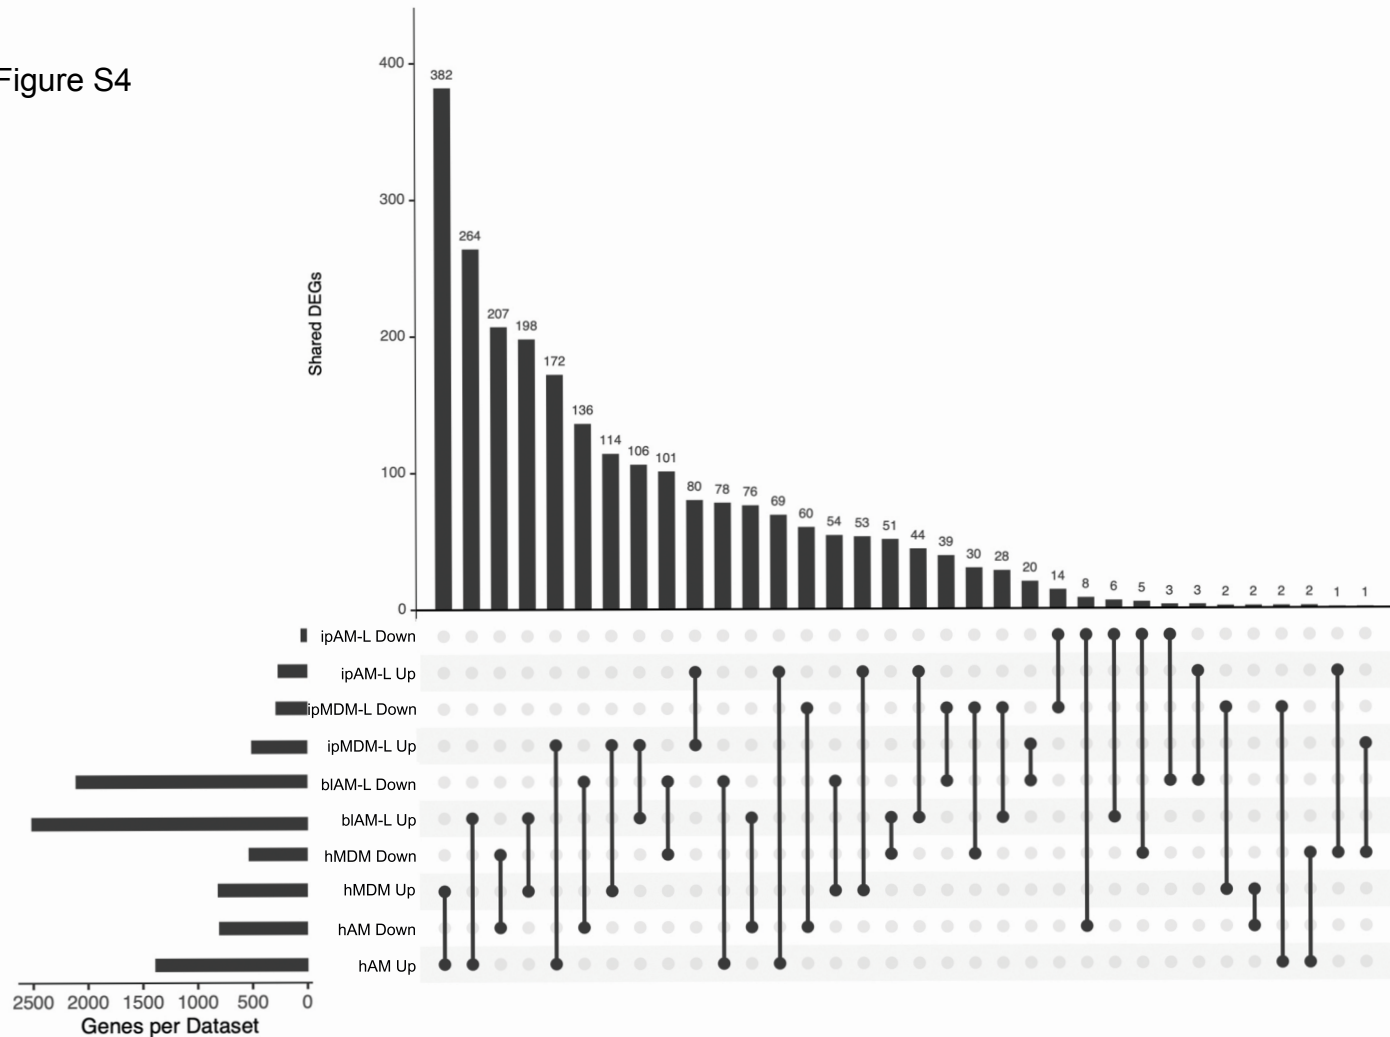

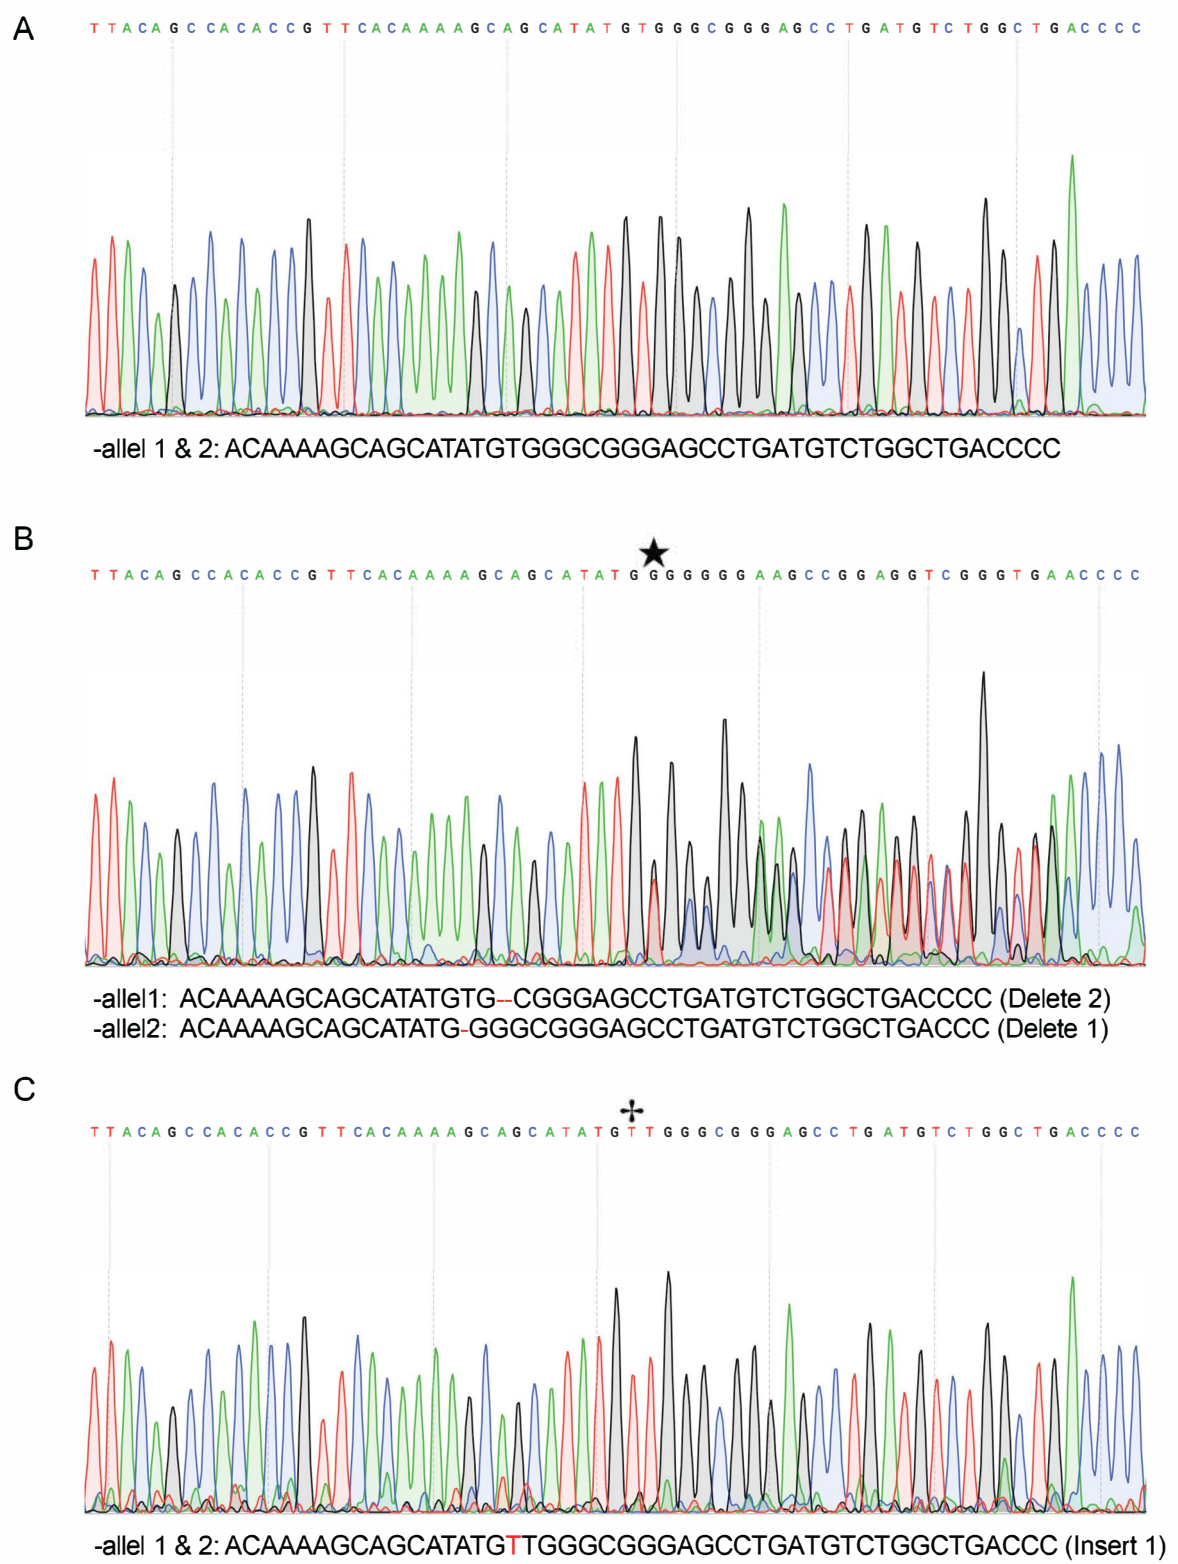

Figure S5

A

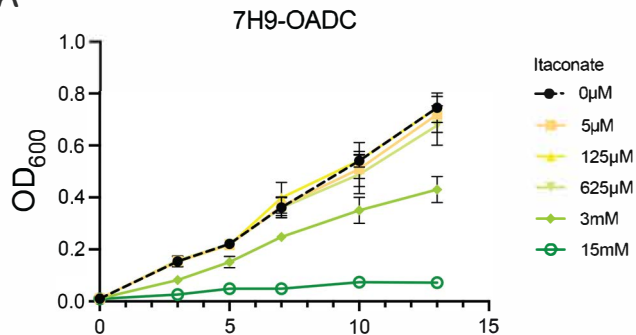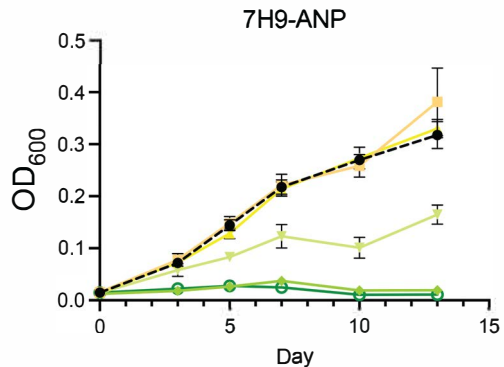

B

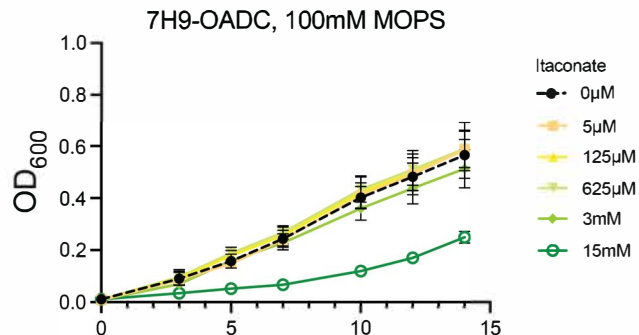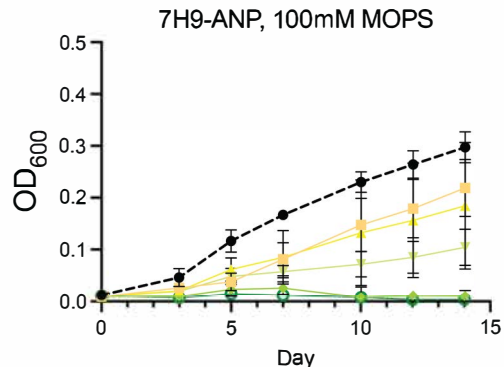

Figure S6

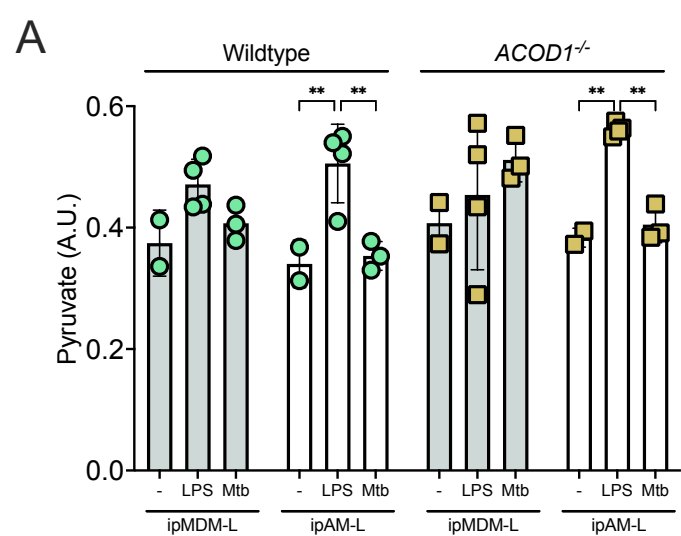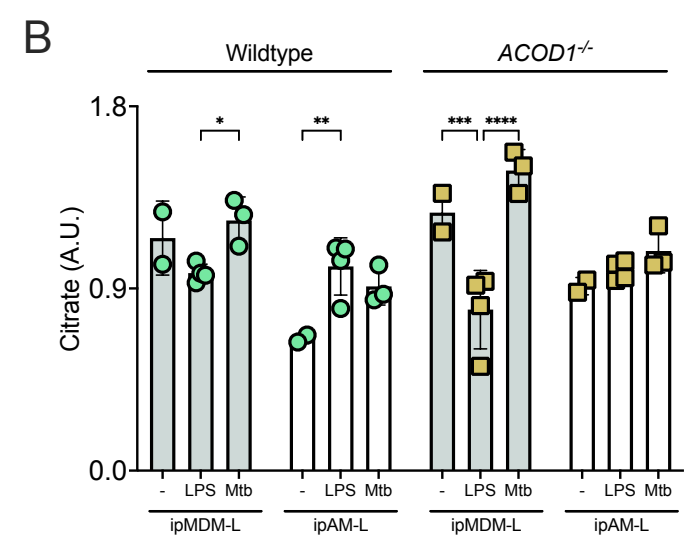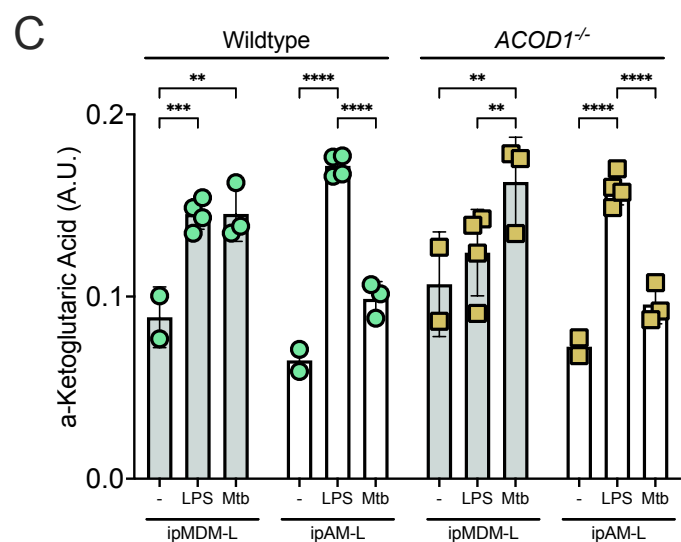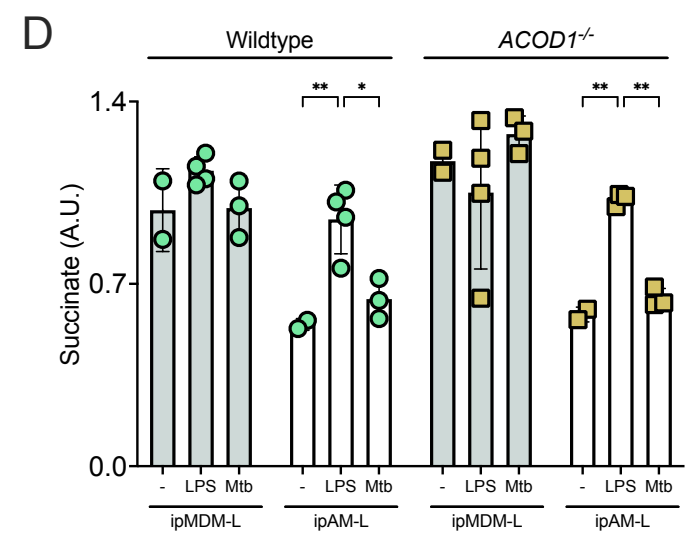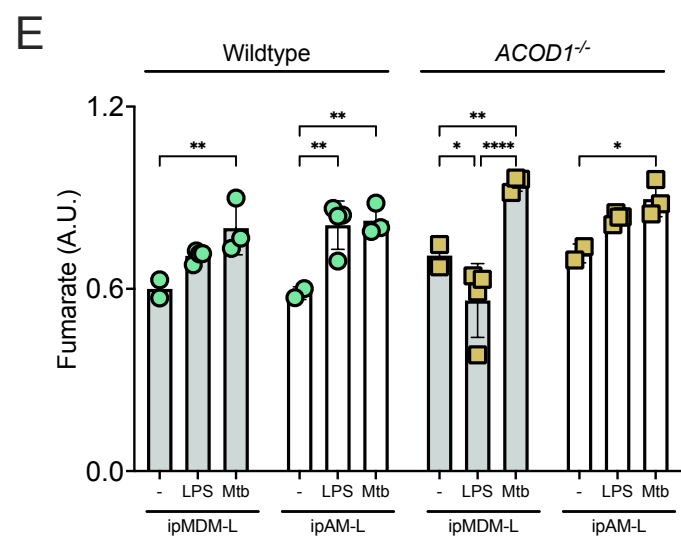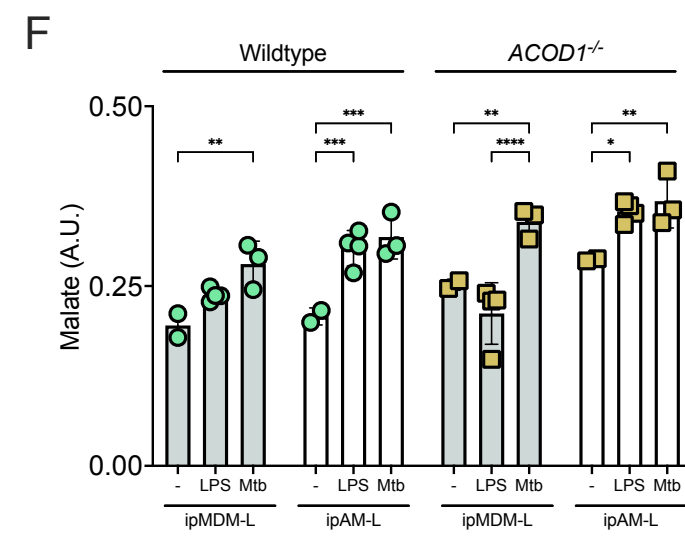

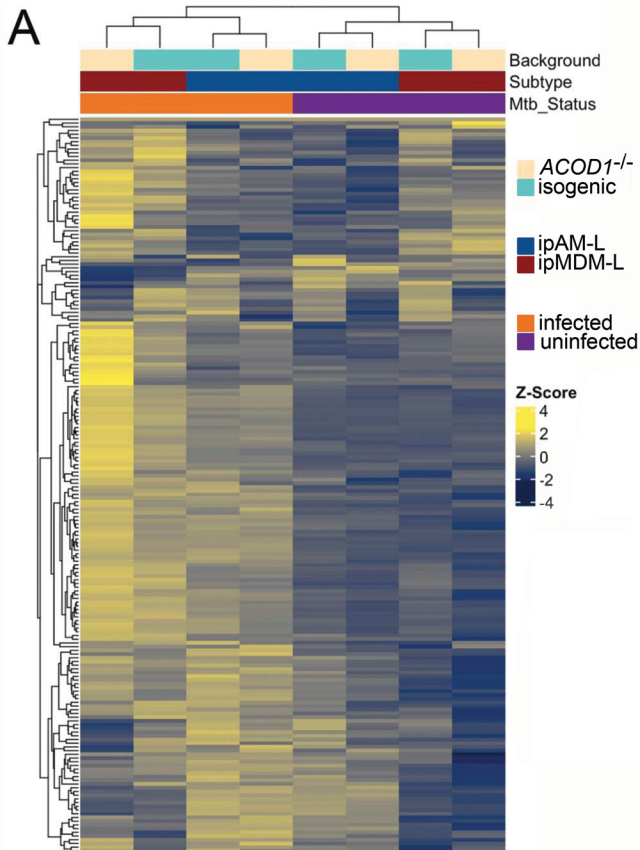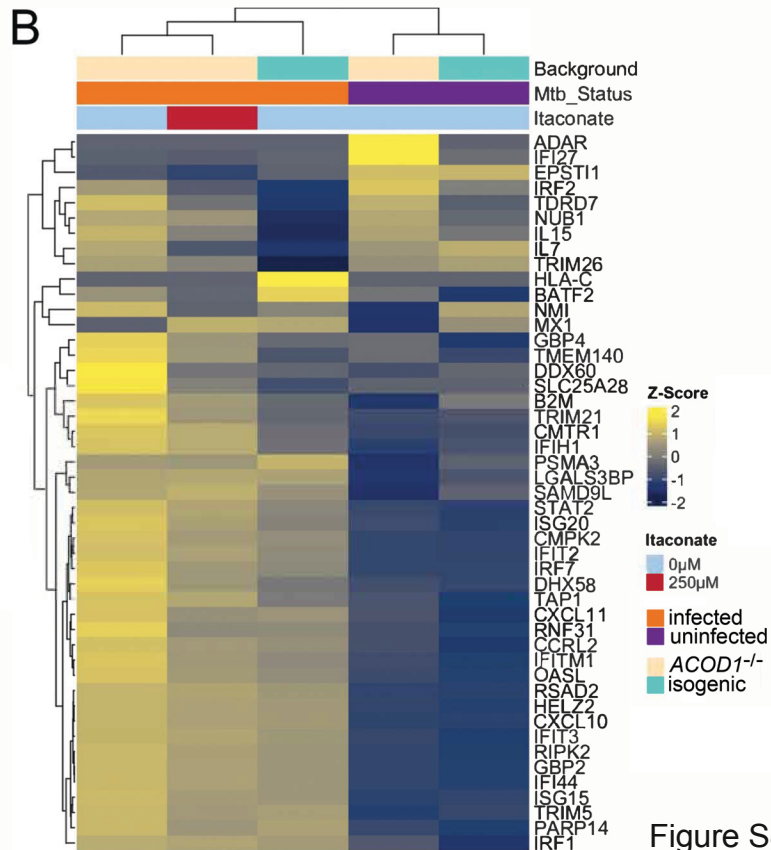

Figure S8
